# Supplementary material
Source: publisher site journal article supplement (https://www.dovepress.com/article/471855)
Supplement: Supplementary file 1 [file get_supplementary_file.php]

**SUPPLEMENT 1**

**Supplement Table 1**: Summary of ICER assessments for pharmaceuticals from 2020 to 2022 High and low ICER estimates

| **Assessment Focus** | **Intervention and Comparators** | **Base Case Perspective** | **Time Horizon** | **Cost-Effectiveness Determination** | **Subgroup Analyses** |
| --- | --- | --- | --- | --- | --- |
| Diabetes Type 2 | - Tirzepatide - Injectable semaglutide + background therapy - Empagliflozin + background therapy - Background therapy alone | Health Care Sector | Lifetime | Range vs. Background Therapy Alone   - $58,000/QALY -$101,000/QALY | No subgroup analyses |
| Asthma | - Dupilumab + SoC - Omalizumabv + SoC - SoC alone | Health Care Sector | Lifetime | - $430,000/QALY - $1,480,000/LY - $422,000/evLY | Subgroup Analysis   - Allergic asthma - Eosinophilic asthma - Steroid dependent asthma |
| Hypertrophic Cardiomyopathy | - Mavacamten - Disopyramide - Septal Ablation - Myectomy - SoC | Health Care Sector | Lifetime | - $1,200,000 -$1,500,000/QALY - $1,200,000 -$5,600,000/evLY - $219,000-­$278,000/1 NYHA I year | Subgroup Analysis   - Symptomatic non-obstructive HCM - symptomatic obstructive HCM |
| Myasthenia Gravis | - Eculizumab + conventional therapy - Efgartigimod + conventional therapy - Conventional therapy alone | Health Care Sector | 2 years | - Eculizumab + conventional therapy   - $5,210,000/QALY   - $1,831,000/improved state - Efgartigimod + conventional therapy   - $2,076,000/QALY   - $891,500/improved state | No subgroup analyses |
| Atopic Dermatitis | - Abrocitinib - Baricitinib - Tralokinumab - Upadacitinib - Dupilumab - Standard of Care (Topicals) | Health Care Sector | 5 years | - Range vs. Standard of Care   - $71,600 -$303,400/QALY   - $48,300 -$303,400/evLYG - Range vs. Dupilumab   - $303,400-$1,912,200/QALY   - $303,400-$1,912,200/evLYG | Subgroup analysis   - Patient Age - Disease severity |
| Alzheimer's Disease | - Aducanumab - Supportive care alone | Health Care Sector and Modified Societal Perspective | Lifetime | - Health care Perspective   - $1,330,000/QALY   - $1,020,000/evLYG   - $1,430,000/LY gained   - $1,270,000/Additional Year in the Community - Modified Societal Perspective   - $1,270,000/QALY   - $938,000/evLYG   - $1,420,000/LY gained   - $1,260,000/Additional Year in the Community | Subgroup Analysis   - APOE ε4 carrier status - Race |
| Multiple Myeloma | - CAR-T or Belantamab Comparator Market Basket | Health Care Sector | Lifetime | - Ide-Cel v. CAR-T Comparator Market Basket   - $319,000/QALY   - $250,000/LY   - $280,000/evLYG   - $35,000/ additional PFS month gained - Cilta-cel v. CAR-T Comparator Market Basket   - $253,000/QALY   - $207,000/LY   - $228,000/evLYG   - $17,000/ additional PFS month gained - Belantamab v. Belantamab Comparator Market Basket   - $98,000/QALY   - $70,000/LY   - $93,000/evLYG   - $18,000/ additional PFS month gained | NA |
| Lupus Nephritis | - mycophenolate mofetil (MMF)/ Corticosteroids | Health Care Sector | Lifetime | - SoC   - $89,663-$149,260/QALY   - $113,847-$174,250/LY   - $77,835-$131,528/evLYG | NA |
| Anemia in Chronic Kidney Disease | - erythropoiesis-stimulating agent (ESA) | Health Care Sector | Lifetime | “As there were negligible differences in quality-adjusted life years (QALYs) and equal value life years (evLYs) and no difference in life years (LYs) with roxadustat, the resulting incremental cost-effectiveness ratio findings versus ESAs were not reported” | Subgroup Analysis   - Length of time on dialysis - Hyporesponsive to ESAs versus non-hyporesponsive - Iron repletion status - Co-morbidities |
| High Cholesterol | - Inclisiran - Bempedoic acid+ezetimibe - Maximally tolerated statin+ezetimibe | Health Care Sector | Lifetime | - Bempedoic acid+Ezetimibe   - $186,000/QALY   - $168,000/evLYG - Inclisiran   - $157,000/QALY   - $142,000/evLYG | Subgroup Analysis   - Patients with Heterozygous familial hypercholesterolemia |
| Beta Thalassemia | - Betibeglogene autotemcel (beti-cel) - Standard of care | Health Care Sector and Modified Societal Perspective | Lifetime | - Health care Perspective   - $95,000/QALY   - $90,000/evLYG   - $166,000/LY gained   - $25,000/TD Year Averted - Modified Societal Perspective   - $34,000/QALY   - $32,000/evLYG   - $60,000/LY gained   - $9,000/ TD Year Averted | Subgroup Analysis   - Genotype - Age |
| Chemotherapy-Induced Neutropenia | - Trilaciclib vs No Prophylaxis - plinabulin vs early-stage breast cancer patients receiving TAC - Plinabulin + pegfilgrastim vs pegfilgrastim alone | Health Care Sector and Modified Societal Perspective | Lifetime | No Prophylaxis   - Health care Perspective   - $871,000-$1,400,000/QALY   - $844,000-$1,200,000/evLYG   - $4,900,000-$1,800,000/LY   - $15,800-$37,300/Event avoided - Modified Societal Perspective   - $735,000-$1,200,000/QALY   - $712,000-$1,000,000/evLYG   - $1,600,000-$4,100,000/LY   - $13,300-$32,800/ TD Year Averted   Incremental cost-effectiveness ratios were not calculated for plinabulin | Stratification by first- and subsequent-line treatment for Extensive Stage Small Cell Lung Cancer |
| Bladder Cancer | Hypothetical Treatment | Health Care Sector | Lifetime | Patients with CIS ± Ta/T1   - Nadofaragene Firadenovec v. Hypothetical Treatment   - $151,000/QALY   - $135,000/evLYG   - $135,000/LY gained   - $100,000/ Year in Progression-Free State - Oportuzumab Monatox   - $382,000/QALY   - $712,000/evLYG   - $367,000/LY gained   - $281,000/ Year in Progression-Free State - Pembrolizumab   - $114,000/QALY   - $103,000/evLYG   - $102,000/LY gained   - $37,300/ Year in Progression-Free State - Gemcitabine ± Docetaxel   - Dominated/QALY   - Dominated /evLYG   - Dominated /LY gained   - Dominated / Year in Progression-Free State   Patients with High Grade Ta/T1 Alone   - Nadofaragene Firadenovec v. Hypothetical Treatment   - $93,000/QALY   - $85,000/evLYG   - $87,000/LY gained   - $65,000/ Year in Progression-Free State - Oportuzumab Monatox   - $123,000/QALY   - $111,000/evLYG   - $117,000/LY gained   - $88,000/ Year in Progression-Free State - Gemcitabine ± Docetaxel   - Dominated/QALY   - Dominated /evLYG   - Dominated /LY gained   - Dominated / Year in Progression-Free State | Stratification by   - CIS ± HG Ta/T1 - HG Ta/T1 alone |
| Hemophilia A | factor VIII prophylaxis | Health Care Sector | Lifetime | - Valoctocogene Roxaparvovec   - Dominant - Emicizumab   - Cost Saving | NA |
| Non-Alcoholic Steatohepatitis | Optimal SoC | Health Care Sector | Lifetime | - $1,482,000/QALY - $1,226,000/LY - $1,226,000/evLYG | Meta-analyses   - Varied dose of pioglitazone - Duration of follow-up - Use of concomitant vitamin E - Prevalence of T2DM |
| Ulcerative Colitis | SoC | Health Care Sector | Lifetime | Biologic Naïve Population   - $186,000-$1,870,000/QALY - $184,000-$1,847,000/evLYG   Biologic Experienced Population   - $495,000-$1,885,000/QALY - $489,000-$1,878,000/evLYG | NA |
| Cystic Fibrosis | Best supportive care | Health Care Sector | Lifetime | Eligible for Kalydeco Monotherapy Only   - $495,000/QALY - $489,000/evLYG   Homozygous for the F508del Mutation   - $ 1,160,000-$ 1,480,000/QALY - $ 1,040,000-$ 1,360,000/evLYG   Heterozygous F508del with a Residual Function Mutation   - $ 1,100,000-$ 1,340,000/QALY - $ 951,000-$ 1,100,000/evLYG   Heterozygous F508del with a Minimal Function Mutation   - $ 1,050,000/QALY - $ 877,000/evLYG | - Assumed there are patients with slower decline of lung function - Meta analysis |
| Sickle Cell Disease | Optimal SoC | Health Care Sector and Modified Societal Perspective | Lifetime | - $1,082.000/QALY - $589,000/evLYG - $550,000 /LY gained - $57,000 /g/dL per year - $743,000/ acute pain crisis avoided | NA |
| Migraine: Acute Therapies | Placebo | Health Care Sector | 2 years | $39,800-$151,800/QALY | NA |

Source: Author’s analysis of themes included in Institute for Clinical and Economic Review (ICER) assessments published between 2020-2020. Acronyms includes Standard of care (SoC) and NA indicates no consideration.
